# Supplementary material for: β and γ-Cyclodextrin dimers: design, characterization and in silico studies to explore the cooperative effect of the cavities
Source: Royal Society of Chemistry journal article supplement (doi:10.1039/d2nj04649k), 2022-12-26
Supplement: d2nj04649k1.pdf [file d2nj04649k1.pdf]

$\beta$  and  $\gamma$ -Cyclodextrin dimers: design, characterization and in silico studies to explore the cooperative effect of the cavities

Luana La Piana,<sup>a#</sup> Livia Basile,<sup>a#</sup> Chiara Ragusa,<sup>a</sup> Danilo Milardi<sup>b</sup>, Valeria M. V. Zito<sup>b</sup> and Graziella Vecchio<sup>a,\*</sup>

a Università degli studi di Catania, Dipartimento di Scienze Chimiche V.le A.Doria 6, 95125 Catania, Italy

b Istituto di Cristallografia, CNR, via P. Gaifami 9, 95126 Catania, Italy.

#These authors equally contributed

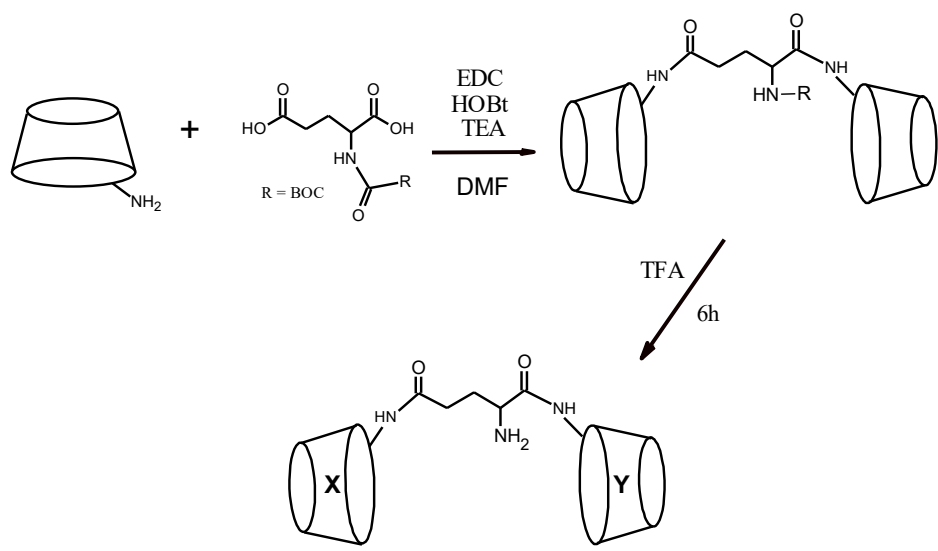

Figure 1S. Synthesis scheme of CyD2Glu systems. R is BOC group

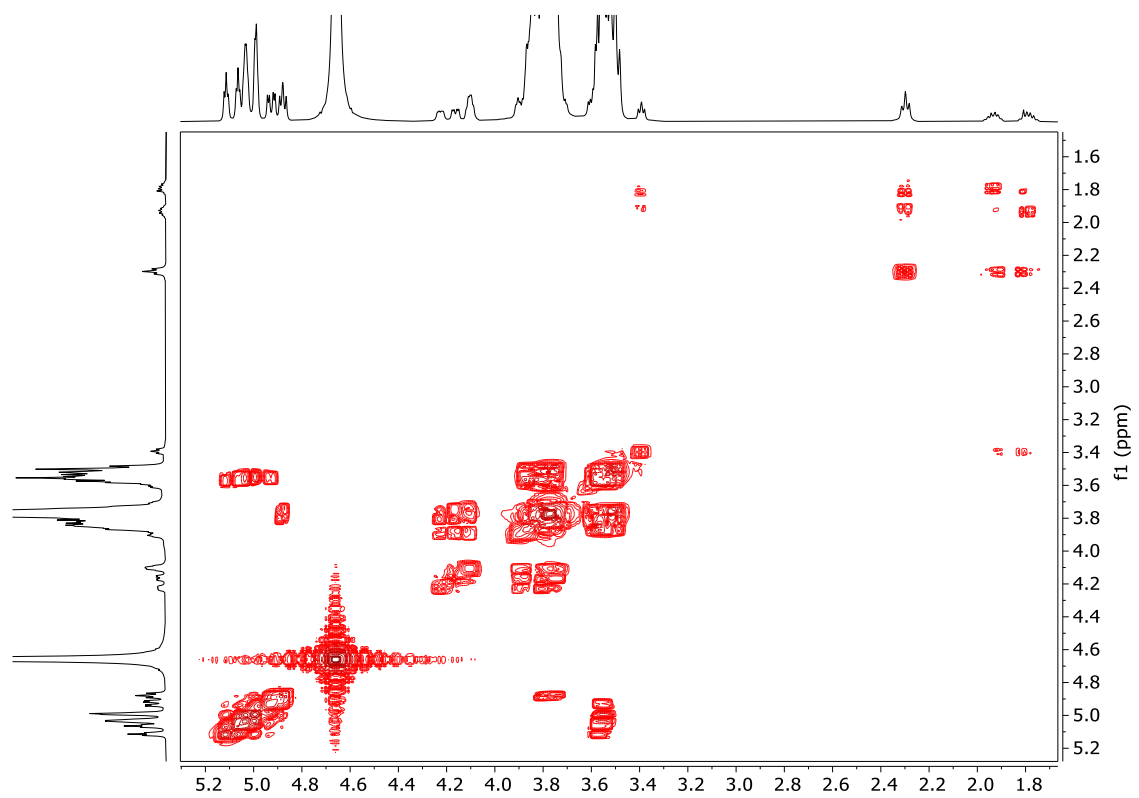

Figure 2S. COSY spectrum of  $\gamma$ CyD2Glu ( $D_2O$ , 500 MHz)

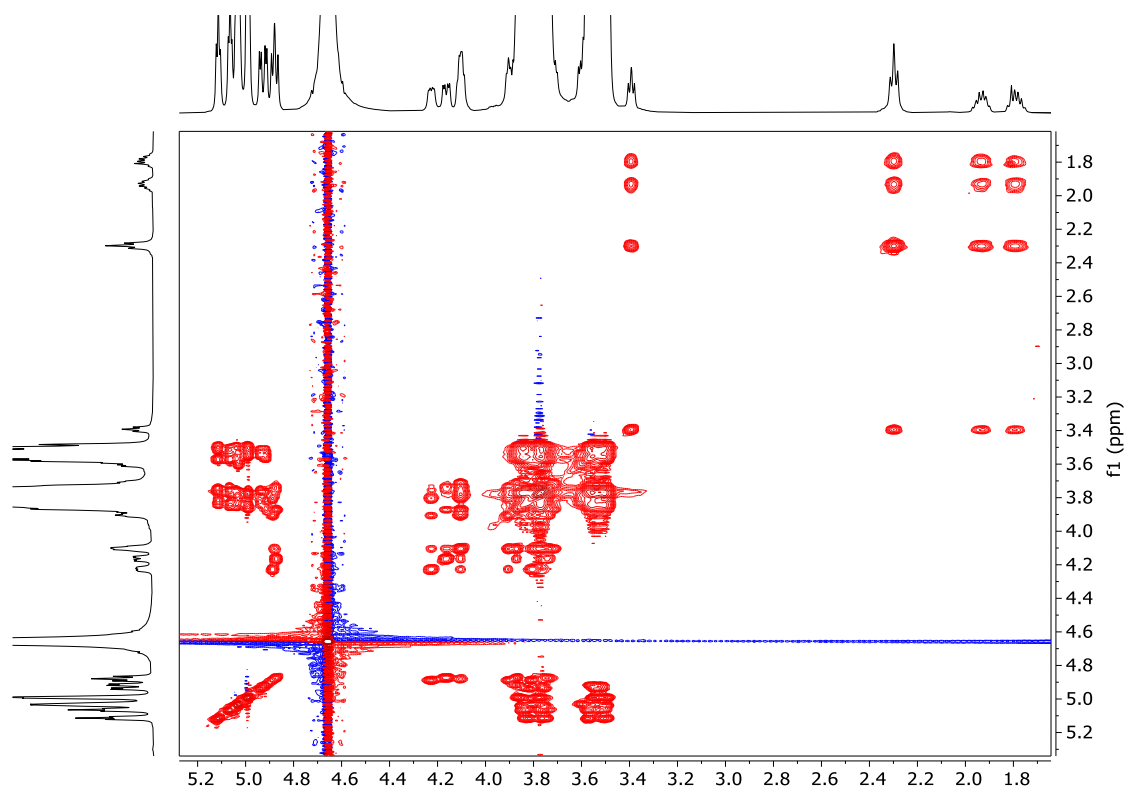

Figure 3S. TOCSY spectrum of  $\gamma$ CyD2Glu ( $D_2O$ , 500 MHz)

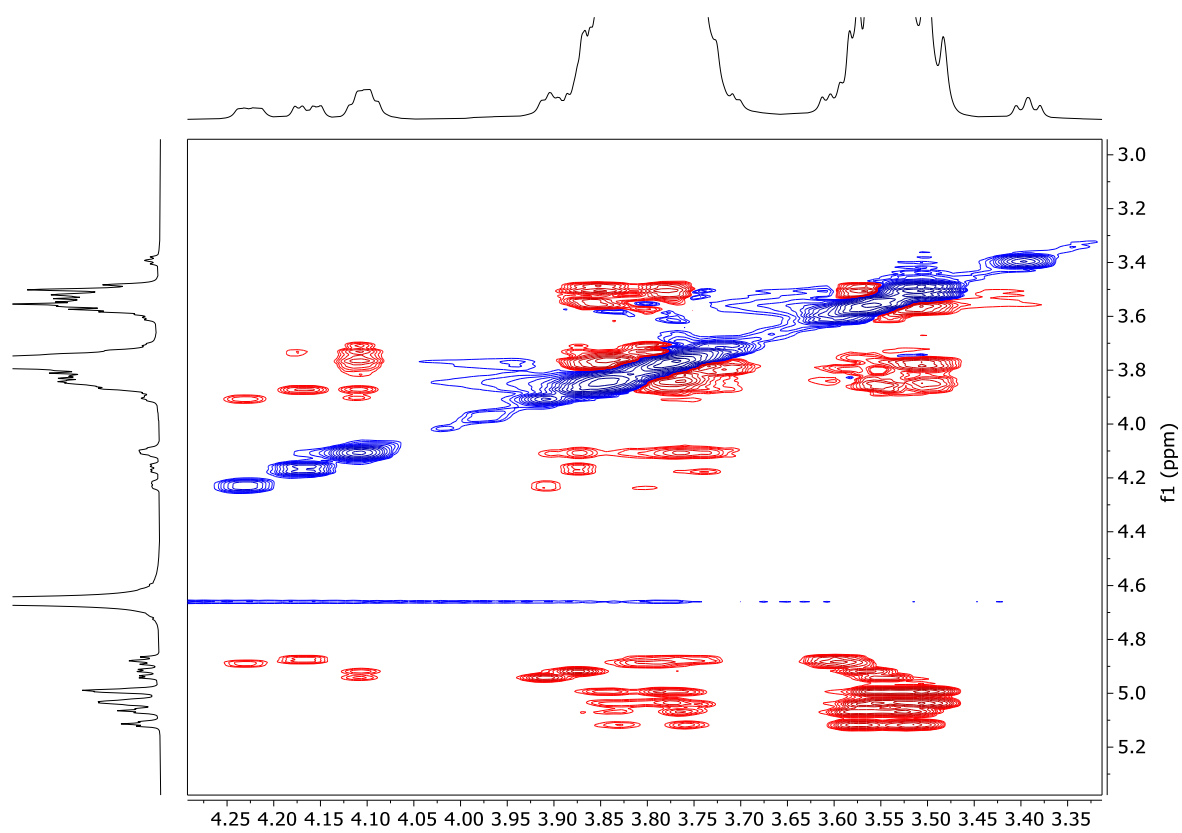

Figure 4S. ROESY of  $\gamma$ CyD2Glu ( $D_2O$ , 500 MHz)

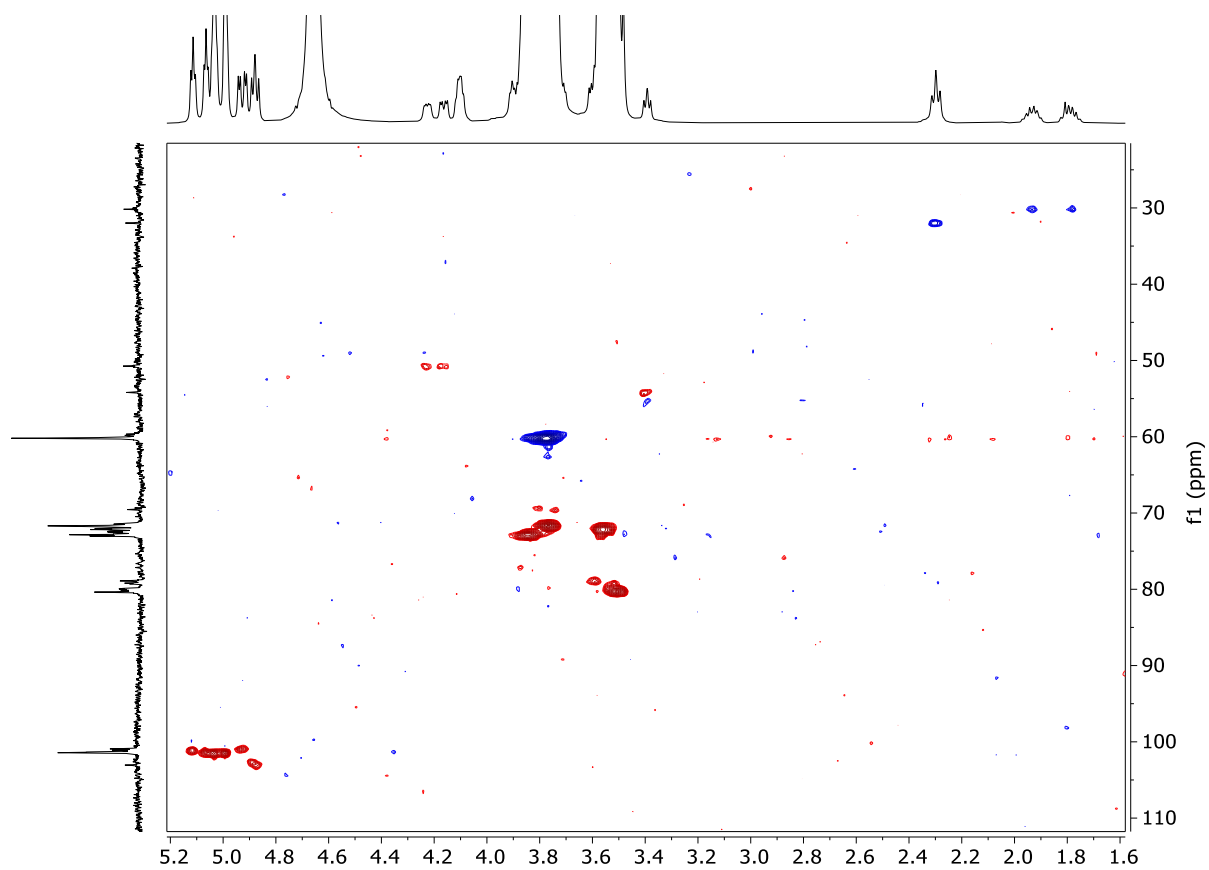

Figure 5S. HSQCAD spectrum of  $\gamma$ CyD2Glu ( $D_2O$ , 500 MHz)

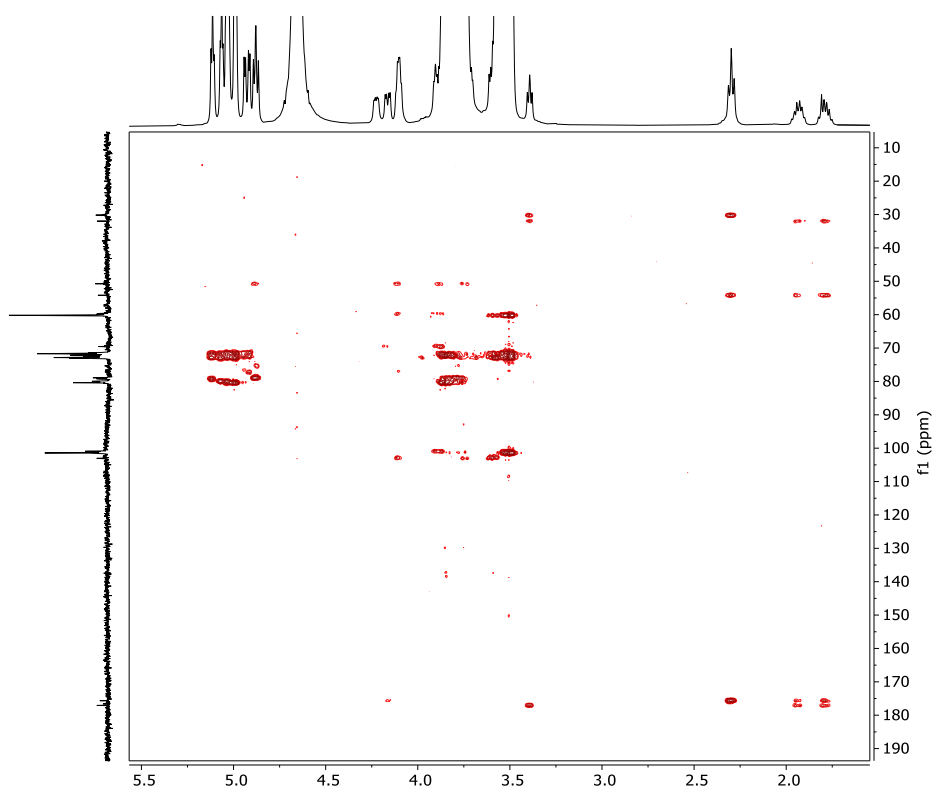

Figure 6S. HMQC spectrum of  $\gamma$ CyD2Glu ( $D_2O$ , 500 MHz)

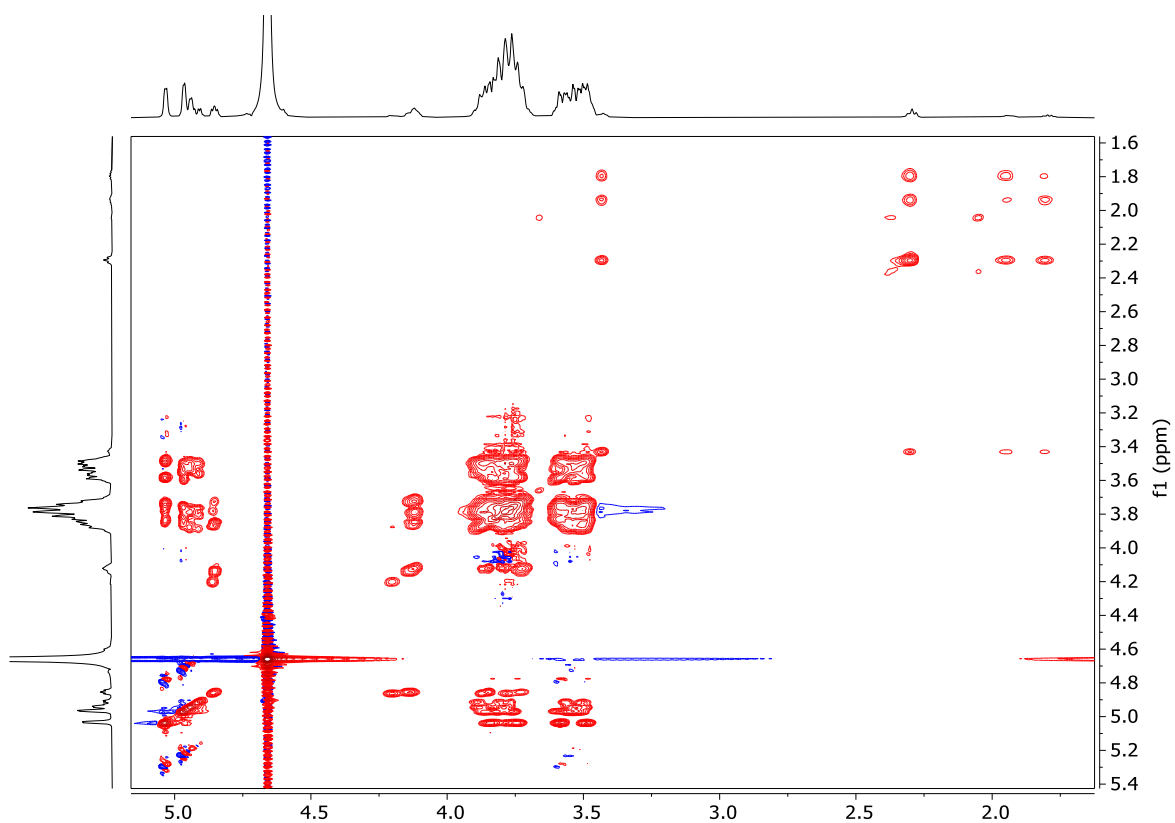

Figure 7S. COSY spectrum of  $\beta$ CyD2Glu ( $D_2O$ , 500 MHz)

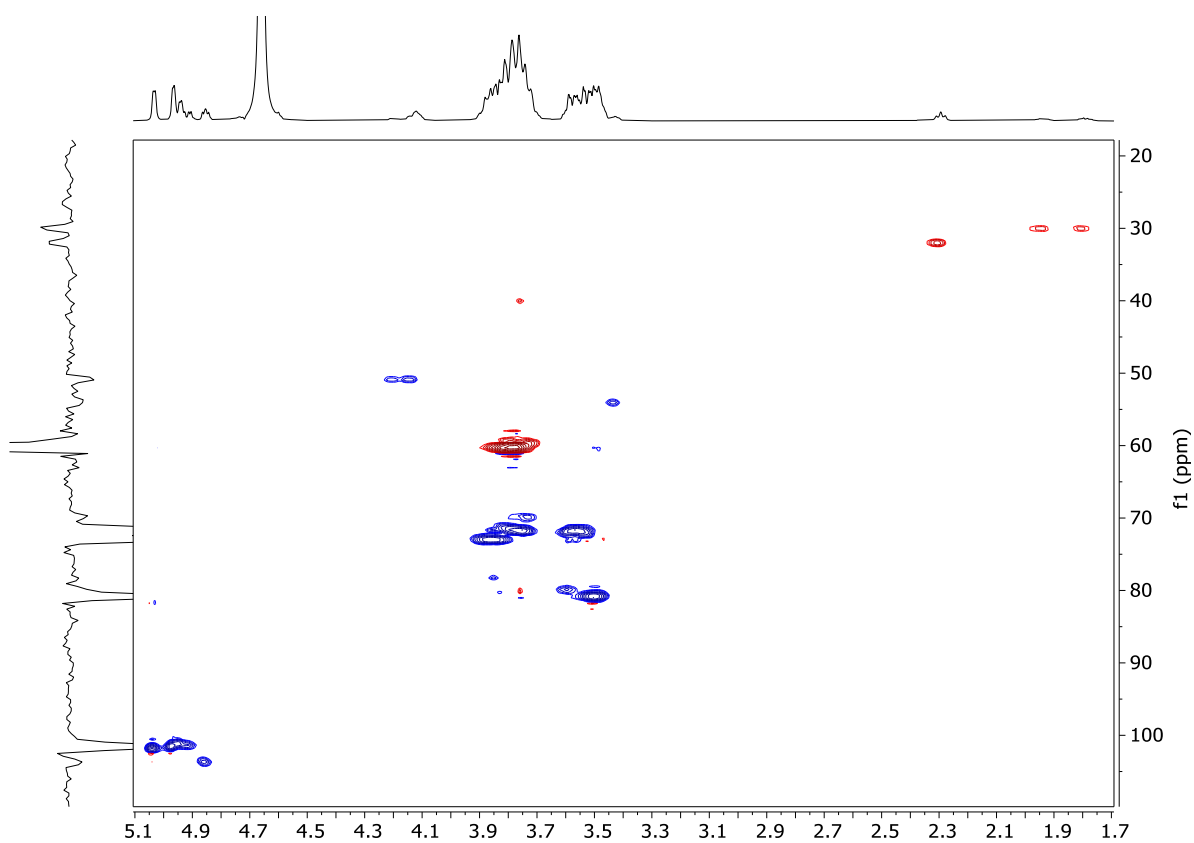

Figure 8S. HSQC spectrum of  $\beta$ CyD2Glu ( $D_2O$ , 500 MHz)

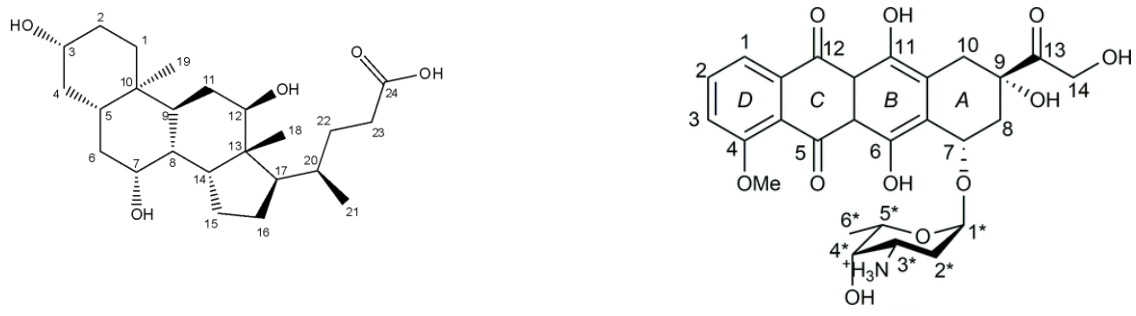

Figure 9S. Cholic acid and DOXO numbering

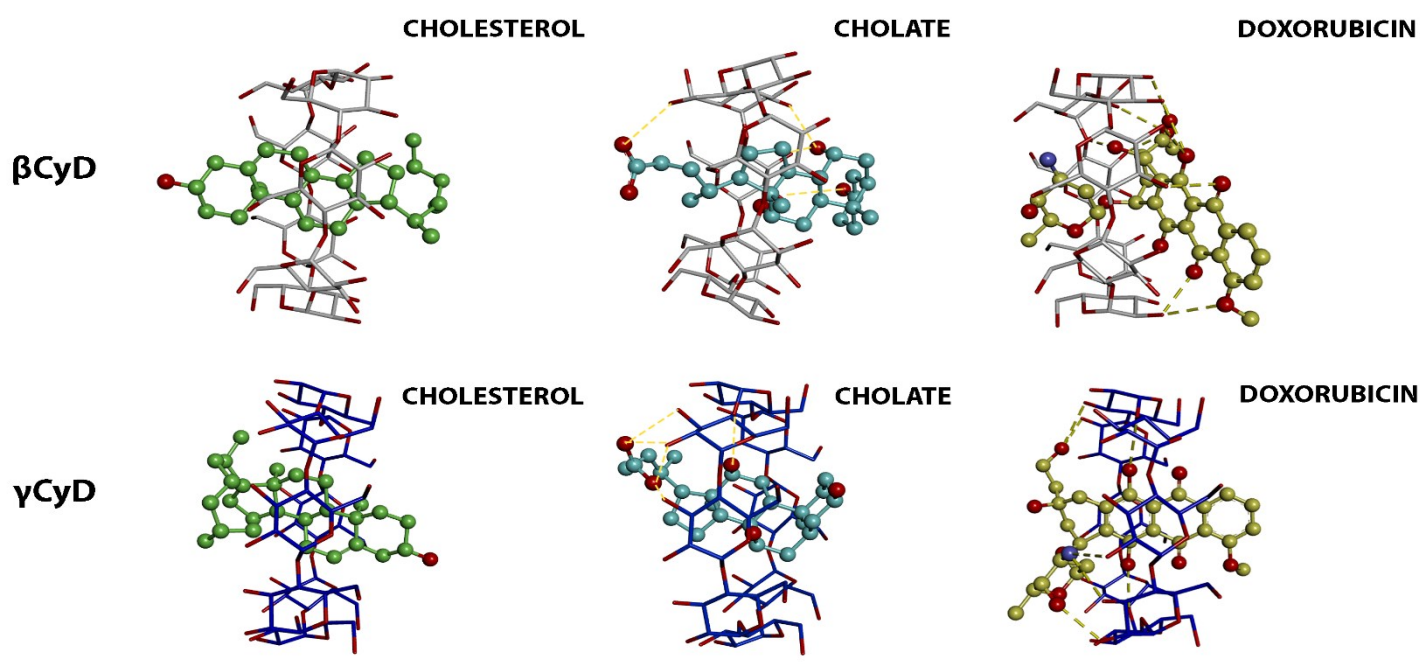

Figure 10S. Docking poses of cholate (blue) cholesterol (green) and doxorubicin (yellow) into the cavity of native β- and γ-cyclodextrins. H bond interactions are depicted as dotted yellow lines

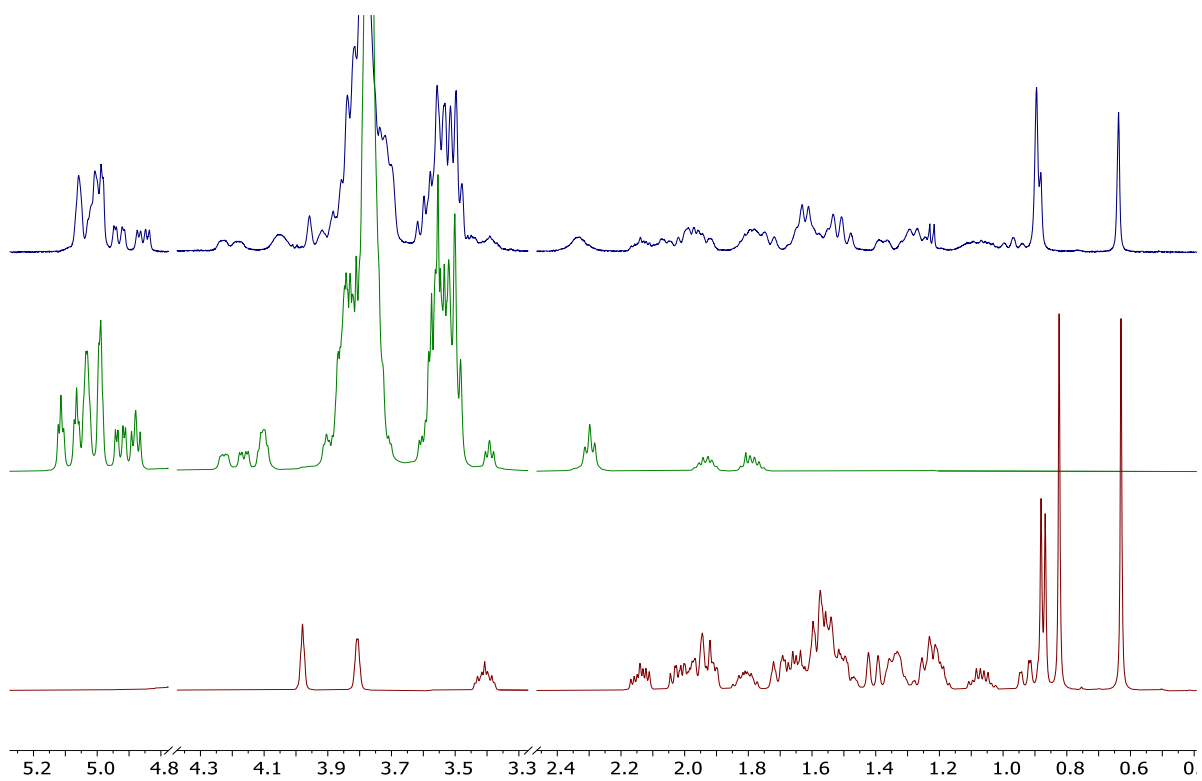

Figure 11S.  $^1\text{H}$  NMR spectrum of Ch/ $\gamma\text{CyD2Glu}$  1:1 molar ratio (500 MHz,  $\text{D}_2\text{O}$ ):  $\gamma\text{Ch}/\beta\text{CyD2Glu}$  (top),  $\gamma\text{CyD2Glu}$  (bottom) and Ch alone (middle)

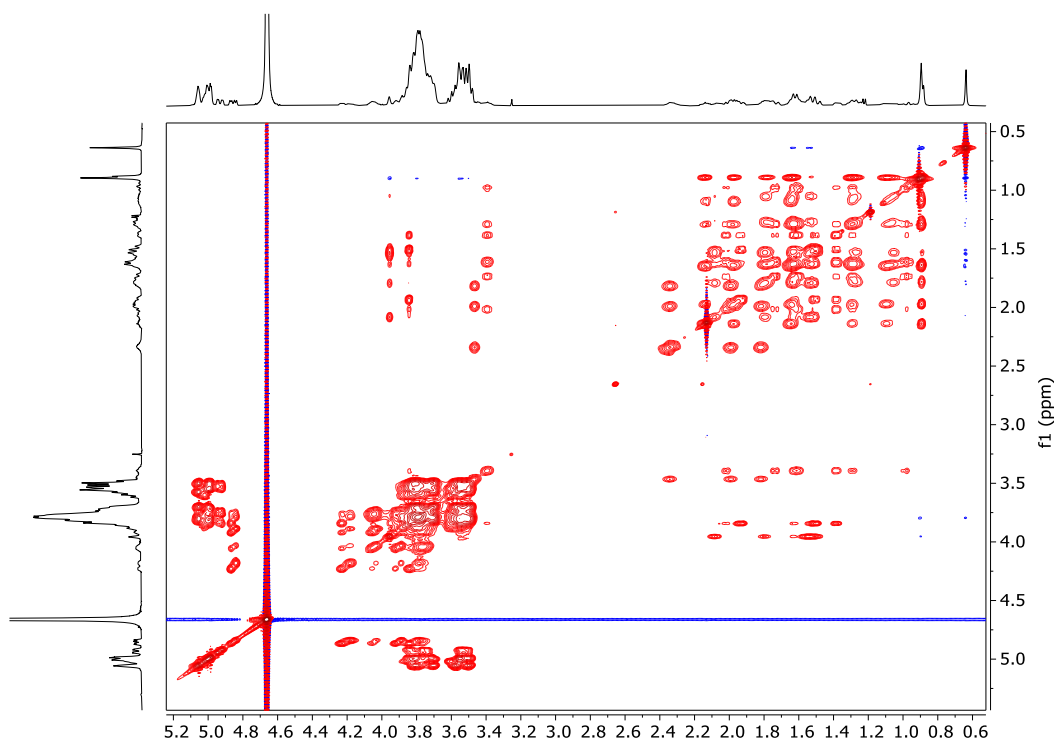

Figure 12S.  $^1\text{H}$  NMR spectrum of  $\gamma\text{CyD2Glu}/\text{Cholate}$  1:1 ( $\text{D}_2\text{O}$ , 500 MHz)

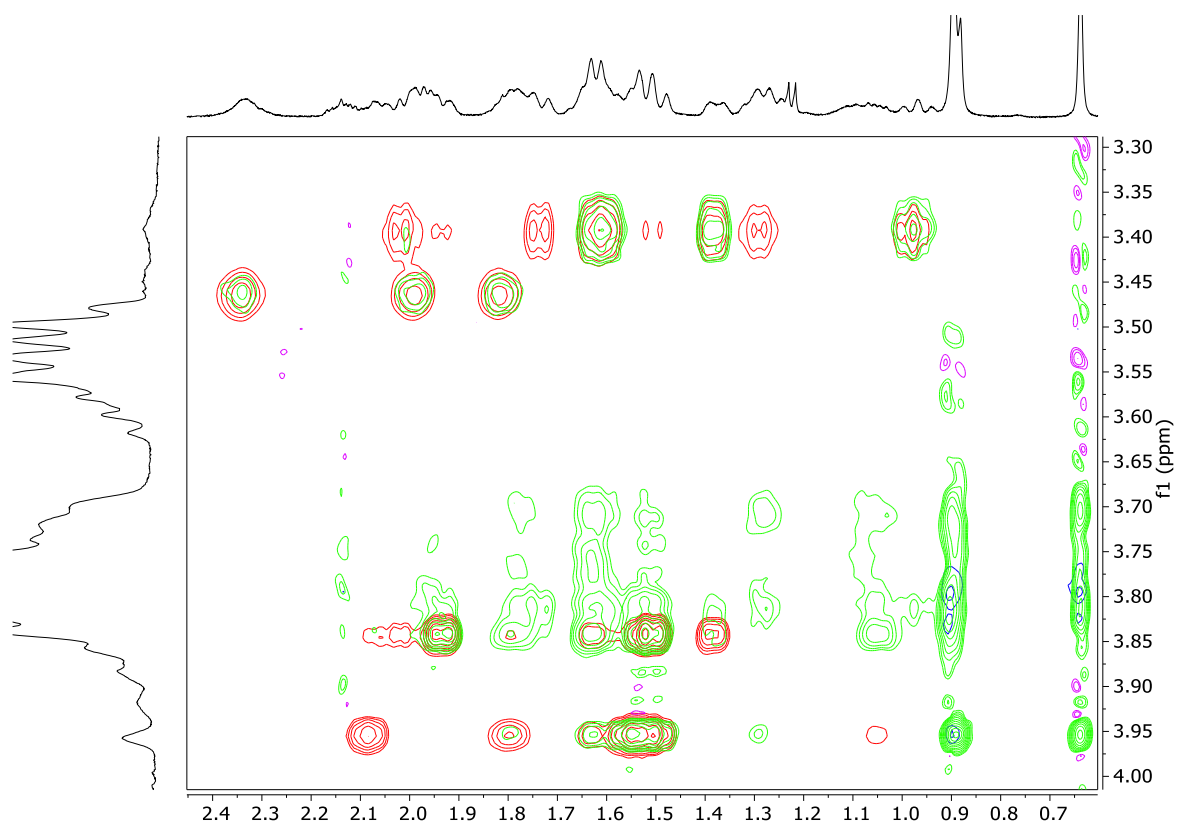

Figure 13S. Overlapped TOCSY (Red) and ROESY (Green) spectra of  $\gamma$ CyD2Glu/Cholate 1:1 ( $D_2O$ , 500 MHz)

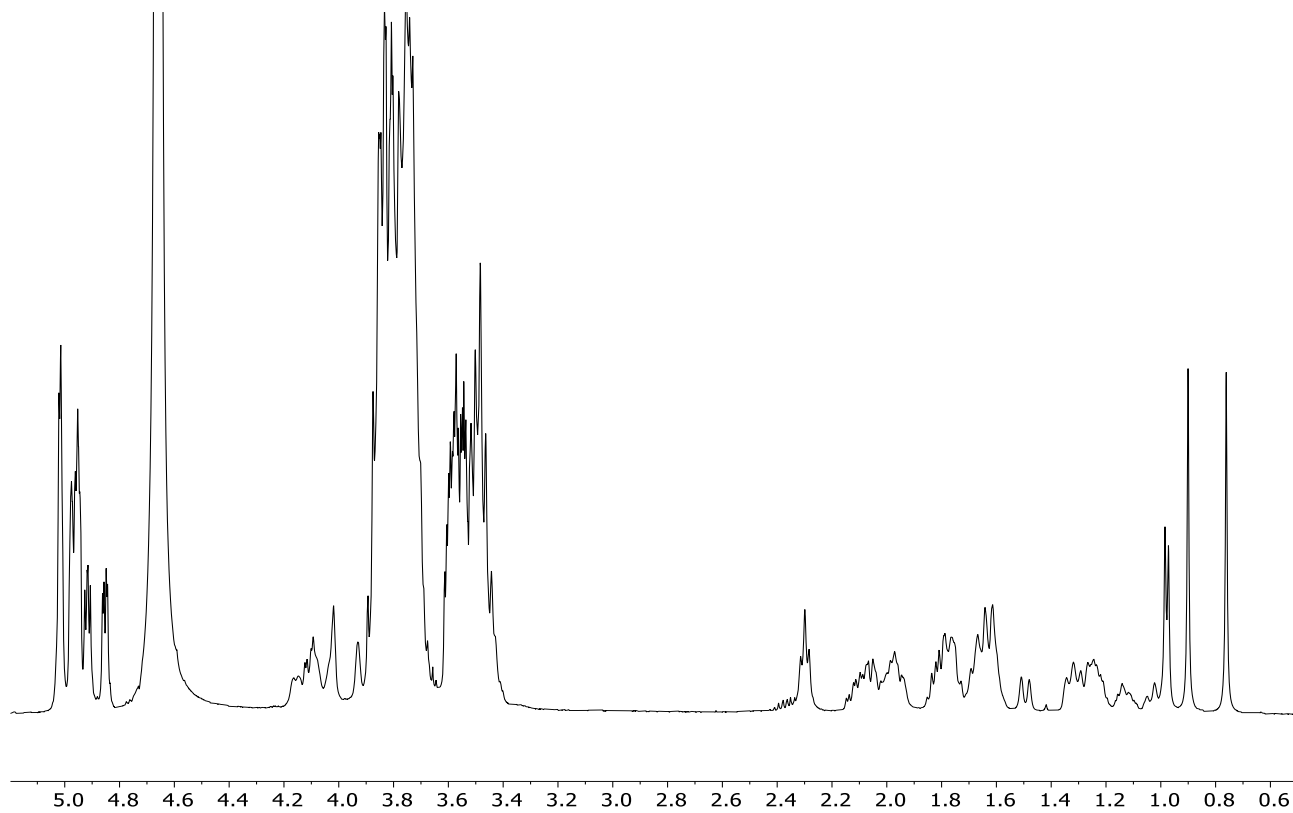

Figure 14S.  $^1H$  NMR spectrum of  $\beta$ CyD2Glu/Cholate 1:1 ( $D_2O$ , 500 MHz)



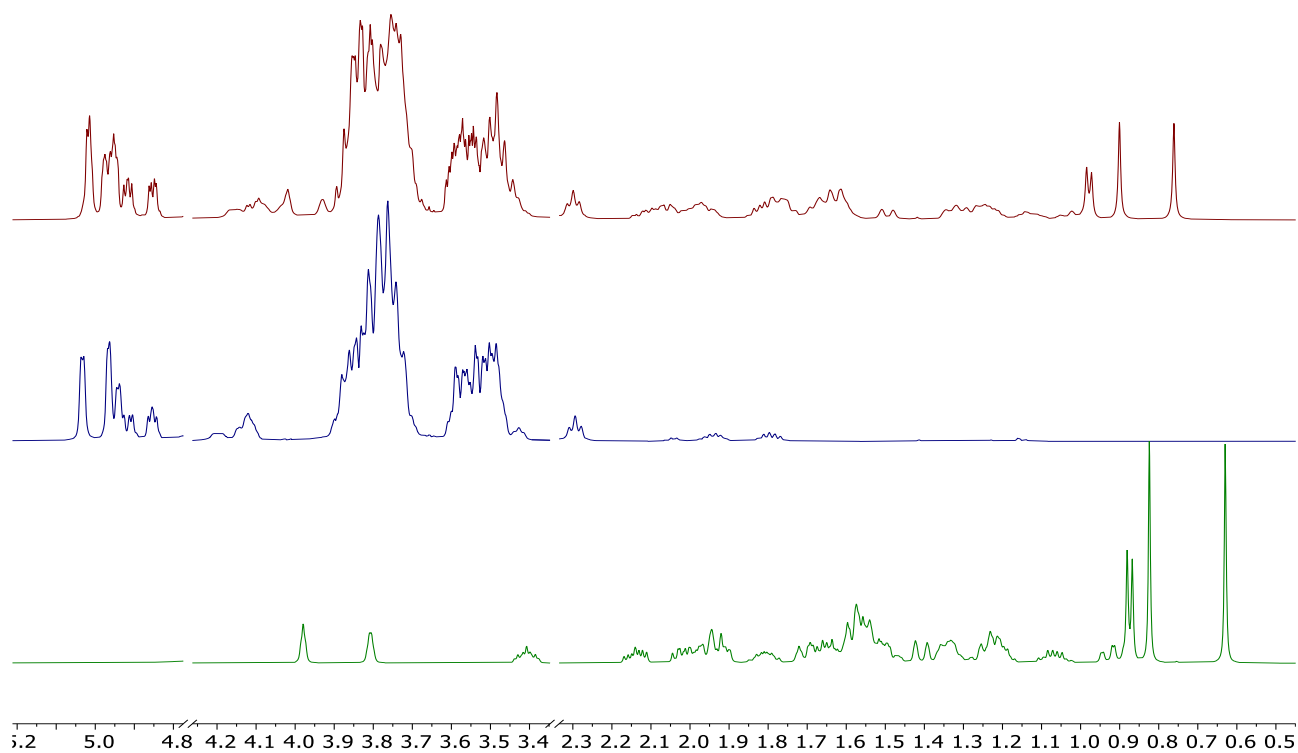

Figure 15S.  $^1\text{H}$  NMR spectrum of Ch/ $\beta\text{CyD2Glu}$  1:1 molar ratio (500 MHz,  $\text{D}_2\text{O}$ ): Ch/ $\beta\text{CyD2Glu}$  (top),  $\beta\text{CyD2Glu}$  (bottom) and Ch alone (middle)

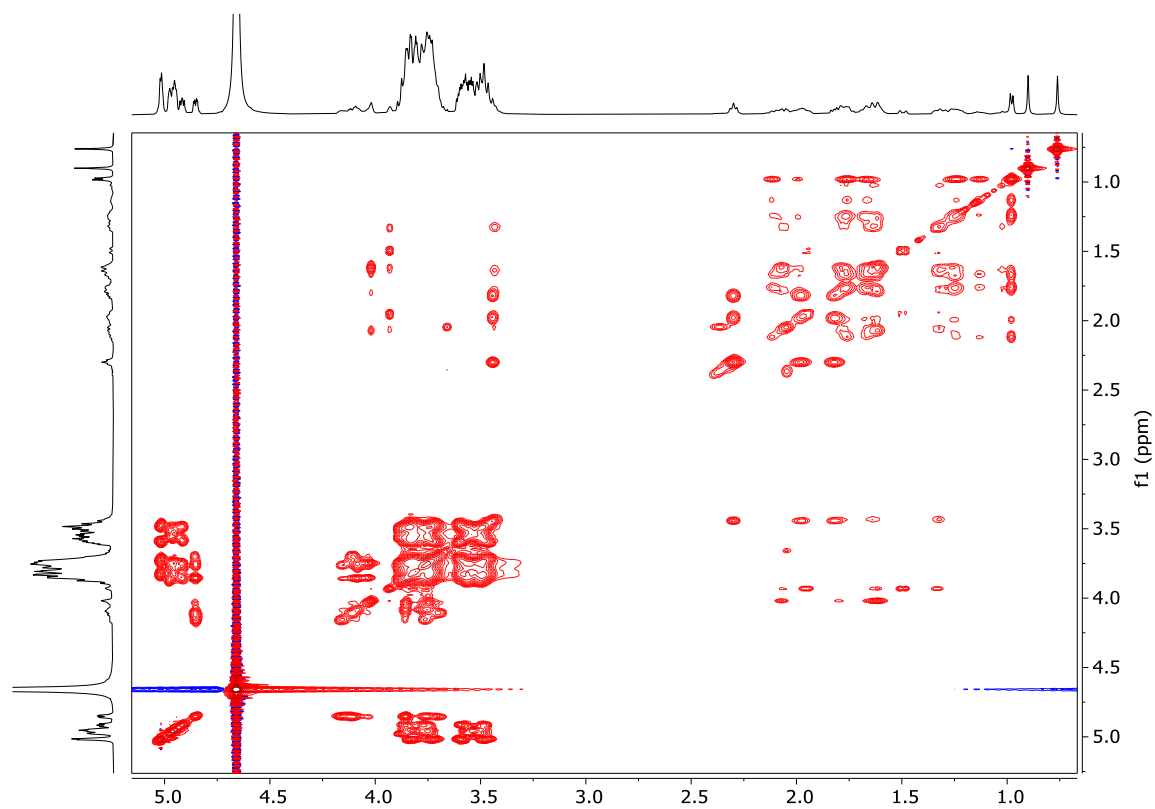

Figure 16S. TOCSY spectrum of  $\beta\text{CyD2Glu}$ /Cholate 1:1 ( $\text{D}_2\text{O}$ , 500 MHz)

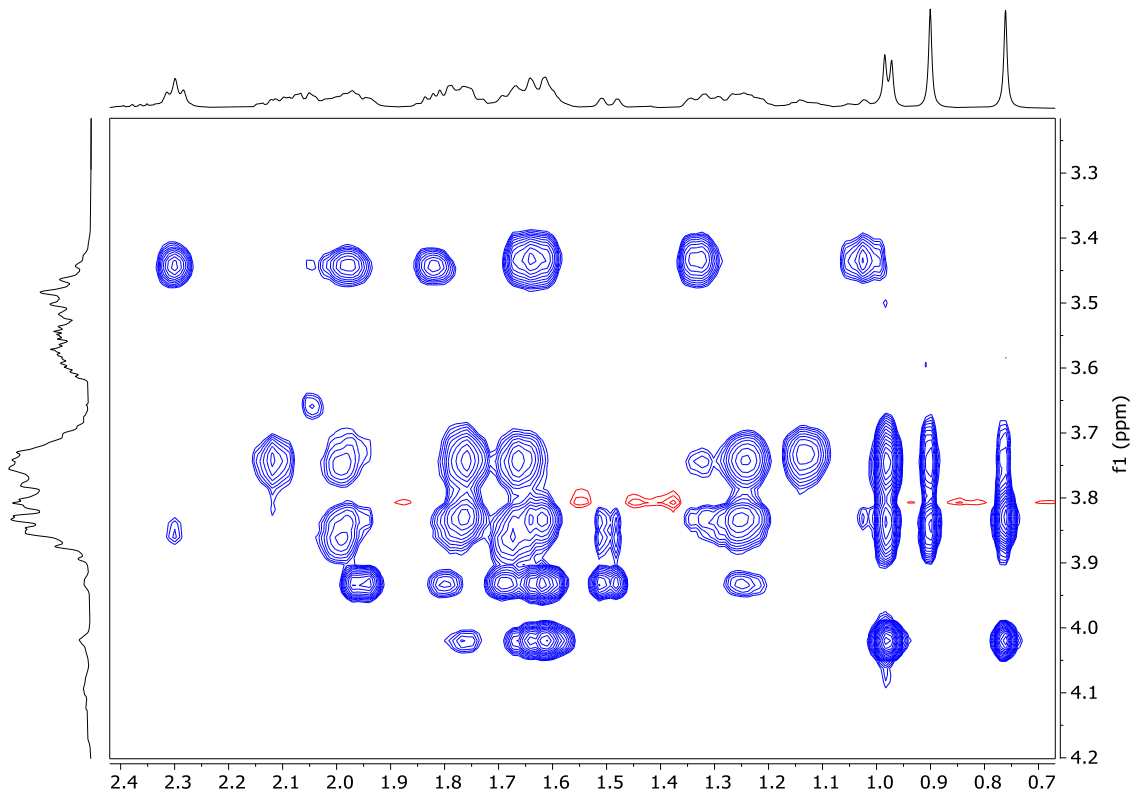

Figure 17S. ROESY of  $\beta$ CyD2Glu/Cholate 1:1 ( $D_2O$ , 500 MHz)

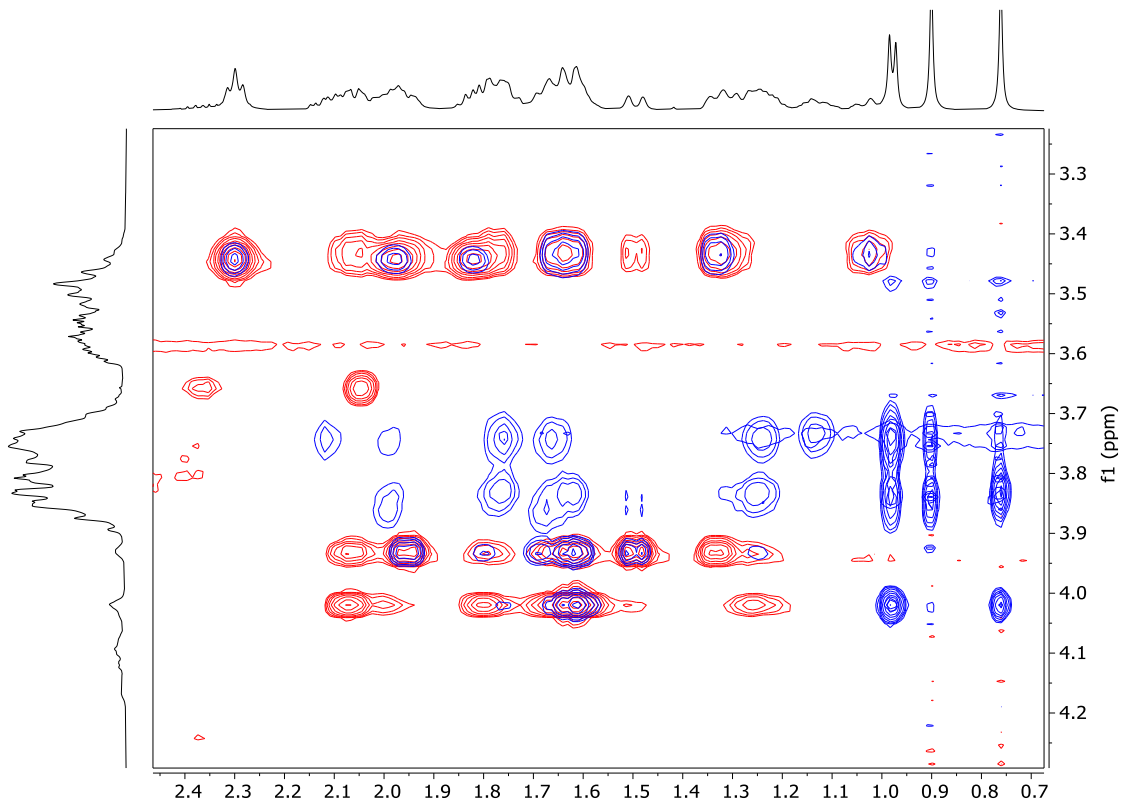

Figure 18S. Overlapped TOCSY (Red) and ROESY (Blue) spectra of  $\beta$ CyD2Glu/Cholate 1:1 ( $D_2O$ , 500 MHz)

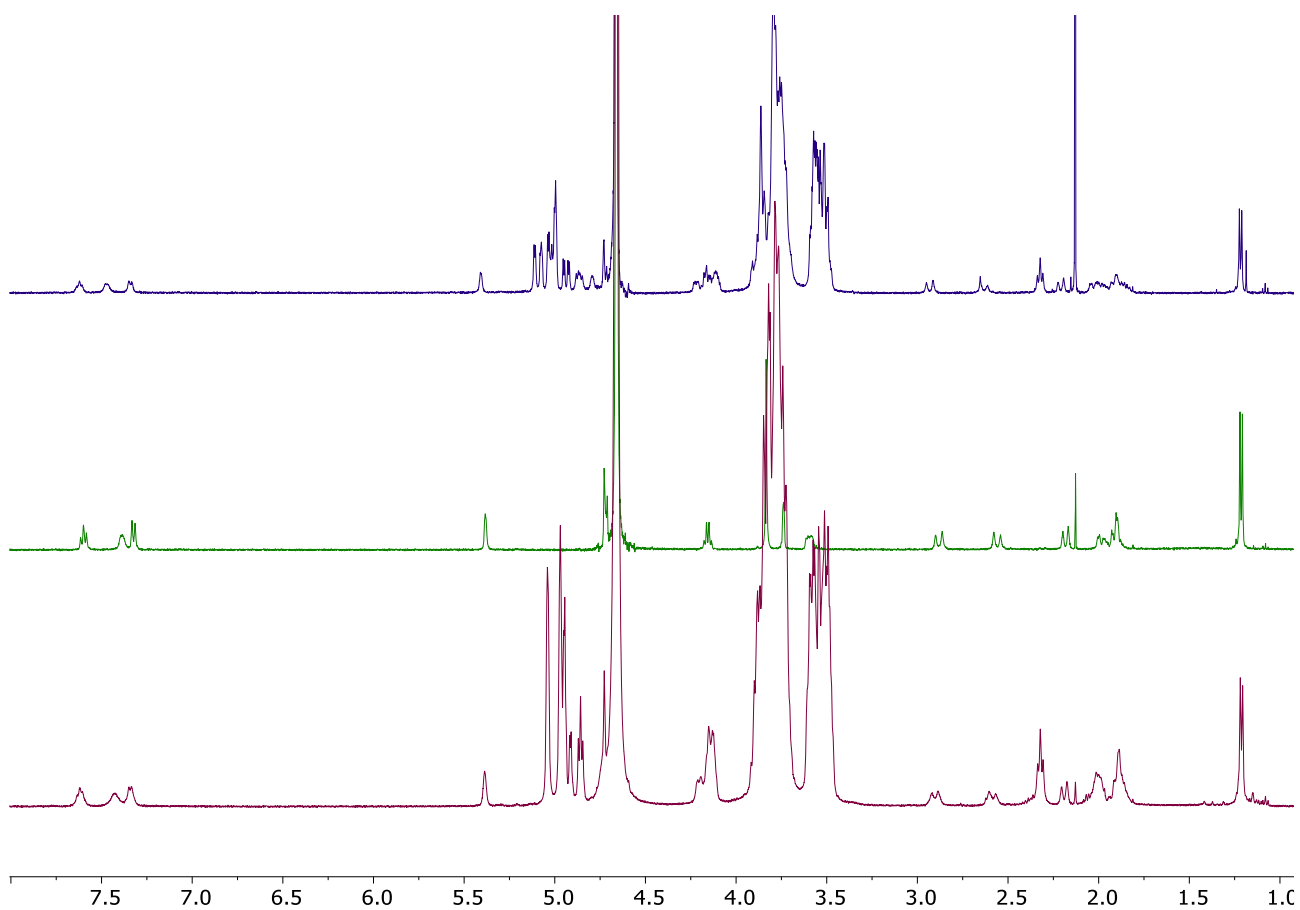

Figure 19S.  $^1\text{H}$  NMR spectrum ( $\text{D}_2\text{O}$ , 500 MHz) of  $\gamma\text{CyD2Glu/DOXO}$  (top); doxo (middle);  $\beta\text{CyD2Glu/DOXO}$  bottom. Acetone trace are present in  $\gamma\text{CyD2Glu}$  spectrum at 2.1 ppm

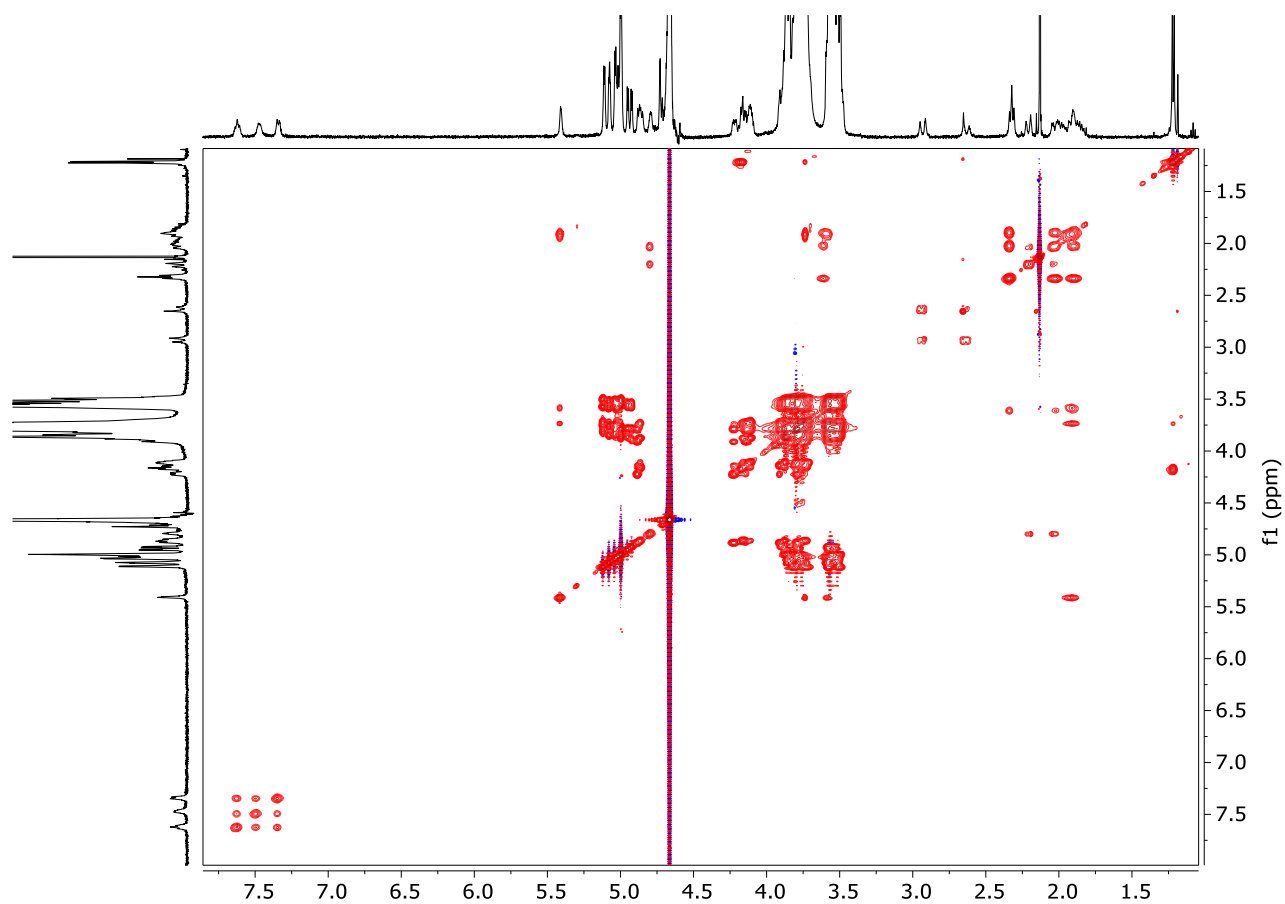

Figure 20S. TOCSY of  $\gamma$ CyD2Glu/DOXO 1:1 ( $D_2O$ , 500 MHz)

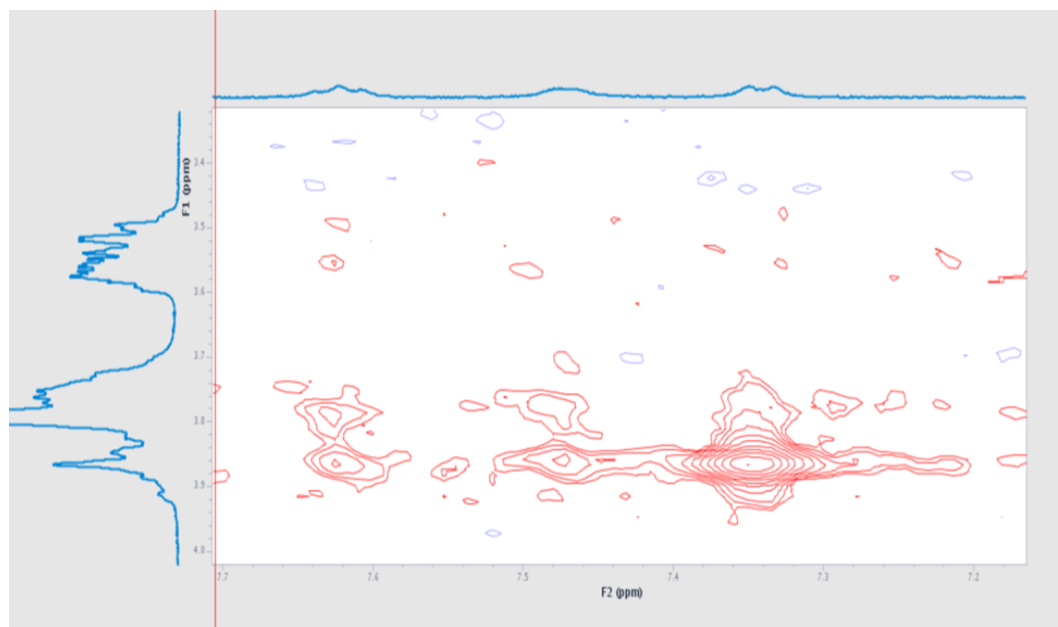

Figure 21S. ROESY of  $\gamma$ CyD2Glu/DOXO 1:1 ( $D_2O$ , 500 MHz)
